# Supplementary material for: A magnetic fluorescence molecularly imprinted polymer sensor with selectivity for dibutyl phthalate via Mn doped ZnS quantum dots
Source: Royal Society of Chemistry journal article supplement (doi:10.1039/c7ra09145a), 2017-01-01
Supplement: c7ra09145a1.pdf [file c7ra09145a1.pdf]

## Supplementary Information

# A magnetic fluorescence molecularly imprinted polymer sensor with selectivity via Mn doped ZnS quantum dots for dibutyl phthalate

Wanzhen Xu<sup>a</sup>, Tao Li<sup>b</sup>, Weihong Huang<sup>a</sup>, Yu Luan<sup>c</sup>, Yanfei Yang<sup>c</sup>, Songjun Li<sup>b,\*</sup>,

Wenming Yang<sup>b,\*</sup>

<sup>a</sup> School of the Environment and Safety Engineering, Jiangsu University, Zhenjiang 212013, China

<sup>b</sup> Institute of Polymer Materials, School of Materials Science and Engineering, Jiangsu University, Zhenjiang 212013, China

<sup>c</sup> Zhenjiang Institute for Drug Control of Jiangsu Province, Zhenjiang 212003, China

## 2. Experimental

### 2.1 Reagents and materials

All reagents used were least analytical grade. Dibutyl phthalate (DBP), ammonia solution (25.0–28.0%), diethyl phthalate (DEP), ethylene glycol, polyethylene glycol, diallyl phthalate (DAP, 99%), MnCl<sub>2</sub>·4H<sub>2</sub>O, NaAc, dimethyl phthalate (DMP, 99%), ferric chloride (FeCl<sub>3</sub>·6H<sub>2</sub>O) and ethanol were purchased from Sinopharm Chemical Reagent Company (Shanghai, China). Tetraethoxysilane (TEOS), Na<sub>2</sub>S·9H<sub>2</sub>O, ethylene glycol dimethacrylate (EGDMA), 3-mercaptopropyltriethoxysilane (MPTS) and 2,2'-azobis (2-methylpropionitrile) (AIBN) were received from Aladdin reagent Co., Ltd. (Shanghai, China). ZnSO<sub>4</sub>·7H<sub>2</sub>O were purchased from Shanghai Chemical Reagents Co., Ltd. 3-(methacryloyloxy) propyltrimethoxysilane (KH-570) were purchased from Nanjing Chemical Reagents Co., Ltd. The ultrapure water was prepared throughout the experiment procedures.

### 2.2 Instruments

The microcosmic characteristic of the products were from transmission electron microscopy (TEM, JEOL, JEM-2100) and scanning electron microscopy (SEM, JEOL, JSM-7001F). Fourier transform infrared spectra (FT-IR) (4000–400 cm<sup>-1</sup>) were recorded using KBr a Nicolet NEXUS-470 FTIR spectrophotometer (USA). The X-ray diffraction (XRD) data were collected on D8-ADVANCE X-ray Diffractometer (Bruker, Germany) with Cu K $\alpha$  radiation over the range of 10 – 80°. Magnetic properties measurements were carried out using a VSM (7300, Lakeshore) at 300 K. The fluorescence spectra were recorded on lumina fluorospectro photometer (ThermoFisher, USA) equipped with a plotter unit and a quartz cell (1.0 cm\*1.0 cm).

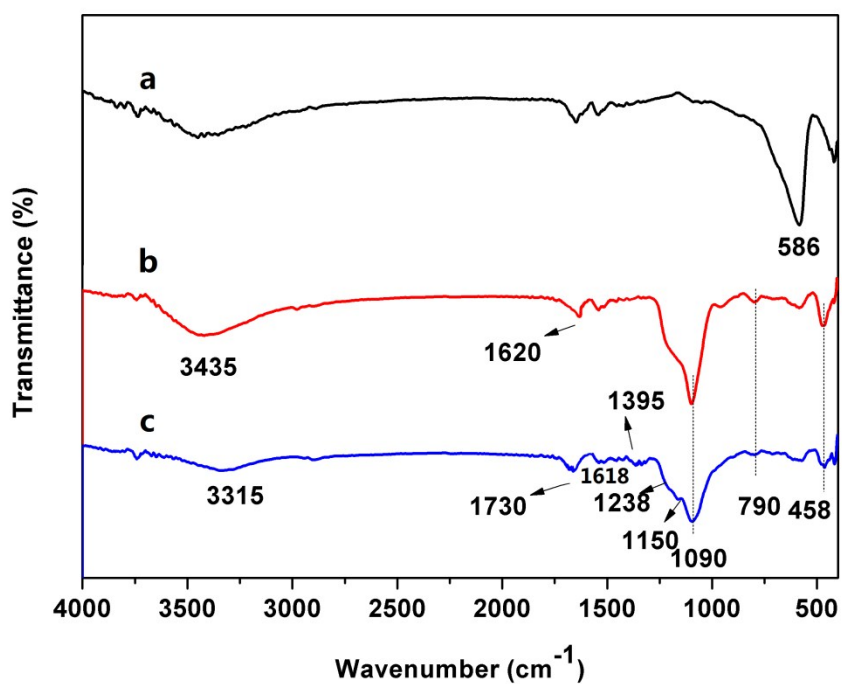

Fig. S1 FT-IR spectra of Fe<sub>3</sub>O<sub>4</sub> (a), MQDs (b) and MQDs-MIPs (c).

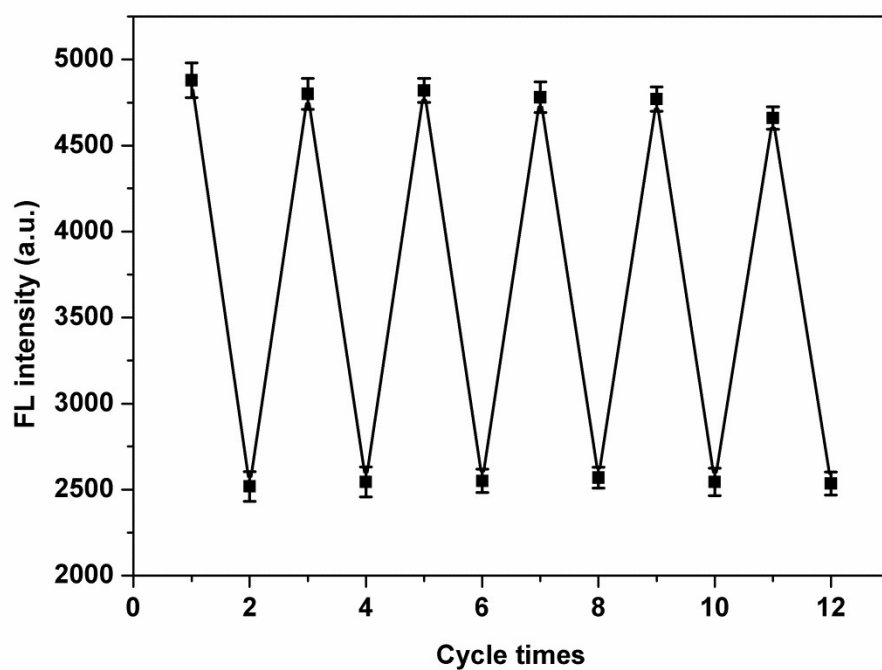

Fig. S2 Recoverability of fluorescence intensity of MQDs-NIPs. Under experimental condition, MQDs-MIPs was 70 mg L<sup>-1</sup> and CBPA was 35 μmol L<sup>-1</sup>.

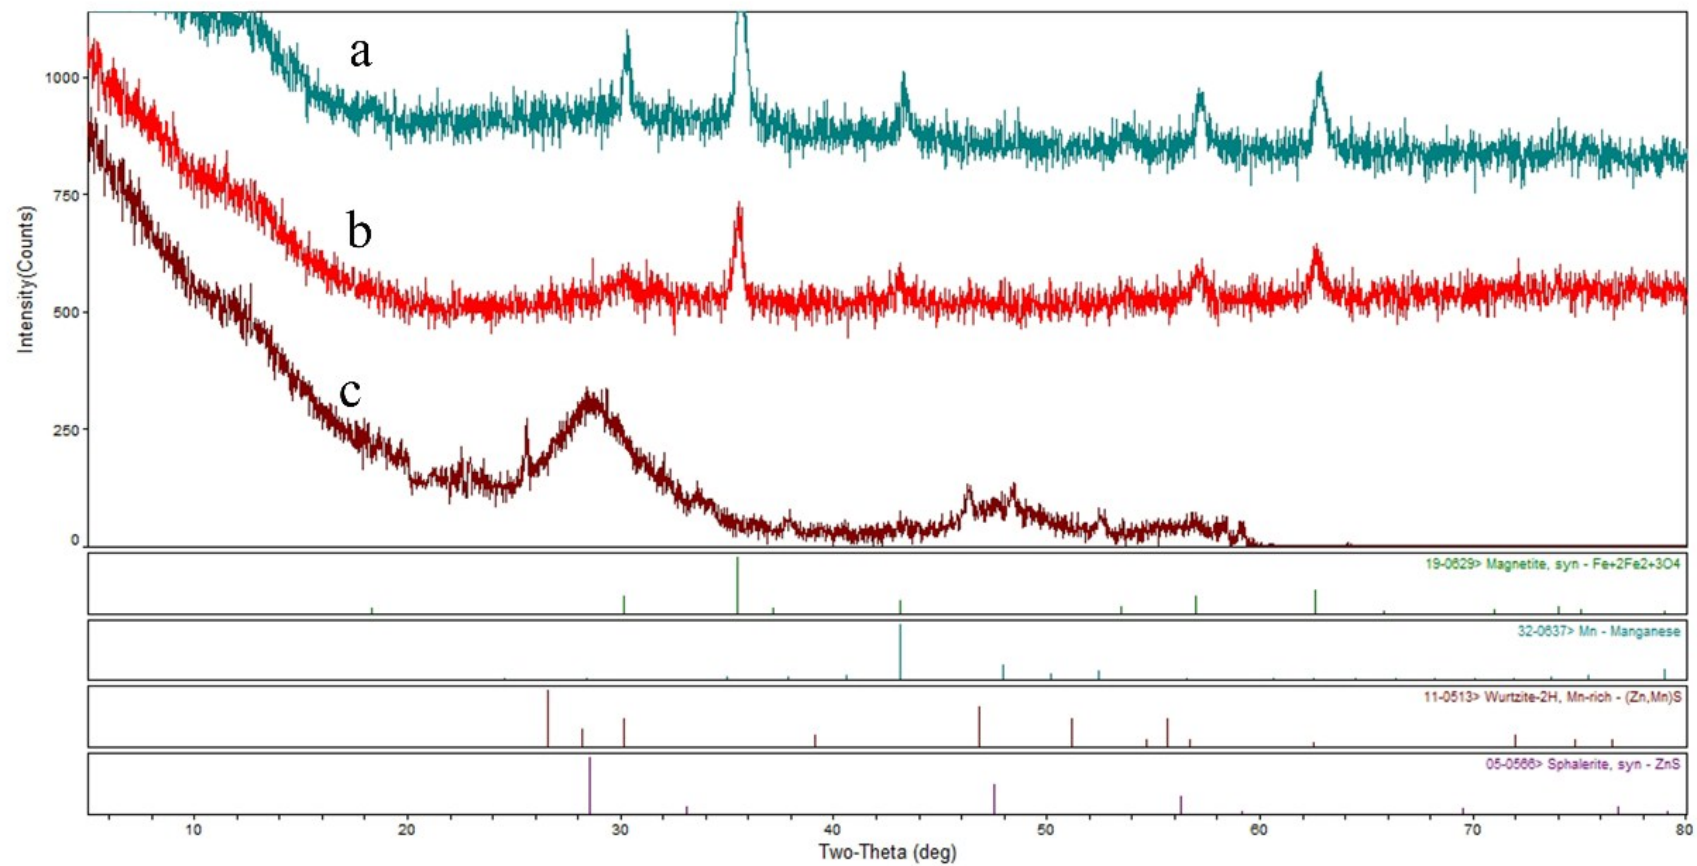

**Fig. S3** X-ray diffraction patterns of  $\text{Fe}_3\text{O}_4$  (a), MQDs-MIPs (b), ZnS:Mn QDs (c) and ZnS

**Table S1.** The interference of different substance on the FL intensity of MQDs-MIPs (Under experiment condition, MQDs-MIPs was 70 mg L<sup>-1</sup> and DBP was 35 μmol L<sup>-1</sup>).

| Coexisting substance          | Coexisting concentration (μmol L <sup>-1</sup> ) | Change of fluorescent intensity (%) for MQDs-MIPs |
|-------------------------------|--------------------------------------------------|---------------------------------------------------|
| Na <sup>+</sup>               | 40                                               | 0.78                                              |
| K <sup>+</sup>                | 40                                               | 0.85                                              |
| Mg <sup>2+</sup>              | 20                                               | 1.53                                              |
| Ca <sup>2+</sup>              | 20                                               | 1.29                                              |
| CO <sub>3</sub> <sup>2-</sup> | 10                                               | 1.89                                              |
| NO <sub>3</sub> <sup>-</sup>  | 10                                               | 2.02                                              |

**Table S2.** Performance Comparison with Other Reported MIP Based QDs Methods.

| System              | Template              | Response time (min) | Linear range                      | Detection limit           | Real sample | Ref.      |
|---------------------|-----------------------|---------------------|-----------------------------------|---------------------------|-------------|-----------|
| CdSe/ZnS QDs@MIP    | caffeine              |                     |                                   |                           |             | 28        |
| MIPs-ZnS:Mn QDs     | 2,6-dichlorophenol    | 50                  | 1.0-56 μmol L <sup>-1</sup>       | 0.23 μmol L <sup>-1</sup> | Real water  | 29        |
| MIP-coated CdTe QDs | cytochrome c          |                     | 0.97-24 μmol L <sup>-1</sup>      | 0.41 μmol L <sup>-1</sup> |             | 30        |
| MIP-capped CdTe QDs | 2,4,6-trinitrotoluene | 10                  | 0.8-30 μmol L <sup>-1</sup>       | 0.28 μmol L <sup>-1</sup> | Soil        | 31        |
| ZnS/Mn QDs@MIP      | diazinon              | 120                 | 50-600 ng mL <sup>-1</sup>        | 8.6 ng mL <sup>-1</sup>   | Tap water   | 32        |
| MIP-coated CdSe QDs | ractopamine           | 40                  | 0.00121-3.03 μmol L <sup>-1</sup> | 0.76 μmol L <sup>-1</sup> | pork        | 33        |
| MQDs-MIPs           | dibutyl phthalate     | 21                  | 5-50 μmol L <sup>-1</sup>         | 0.08 μmol L <sup>-1</sup> | Tap water   | This work |
